# Supplementary material
Source: PubMed Central journal article supplement (PMC5373959)

Supporting Information Data File; Kavanagh et al. 2016

**Regulators of Mitochondrial Quality Control Differs in Subcutaneous Fat of Metabolically Healthy and Unhealthy Obese Monkeys**

Supporting Information Table S1. Characteristics of the laboratory chow diet fed to monkeys assessed as part of study.

| <b>Diet Ingredient</b>     |                   |
|----------------------------|-------------------|
| <b>Total Protein</b>       | 18.2% of calories |
| <b>Total Fat</b>           | 13.1% of calories |
| <b>Total Carbohydrates</b> | 68.7% of calories |
| <b>Simple sugars</b>       | 5.25% of calories |
| <b>Cholesterol</b>         | 0.75 ppm          |
| <b>Saturated Fat</b>       | 4.02% of calories |
| <b>Sodium</b>              | 0.72 mg/kCal      |
| <b>Crude Fiber</b>         | > 6 %             |

## Supporting Information Table S2.

Circulating concentrations of branched chain amino acids (BCAA;  $\mu\text{mol/L}$ ) in MHO and MUO vervet monkeys. Means with standard errors of the means shown in parentheses.

|            | Healthy Obese<br>(n=6) | Unhealthy Obese<br>(n=6) | p-value |
|------------|------------------------|--------------------------|---------|
| Valine     | 152 (8.25)             | 165 (22.5)               | 0.62    |
| Leucine    | 57.1 (9.18)            | 65.8 (15.7)              | 0.64    |
| Isoleucine | 108.1 (10.2)           | 101.0 (9.82)             | 0.63    |
| Total BCAA | 318 (22.1)             | 331 (44.6)               | 0.78    |

Supporting Information Figure S1.

Representative images and primary antibody details used to generate immunoblots from subcutaneous fat proteins from metabolically healthy and unhealthy monkeys.

**MUO MHO**

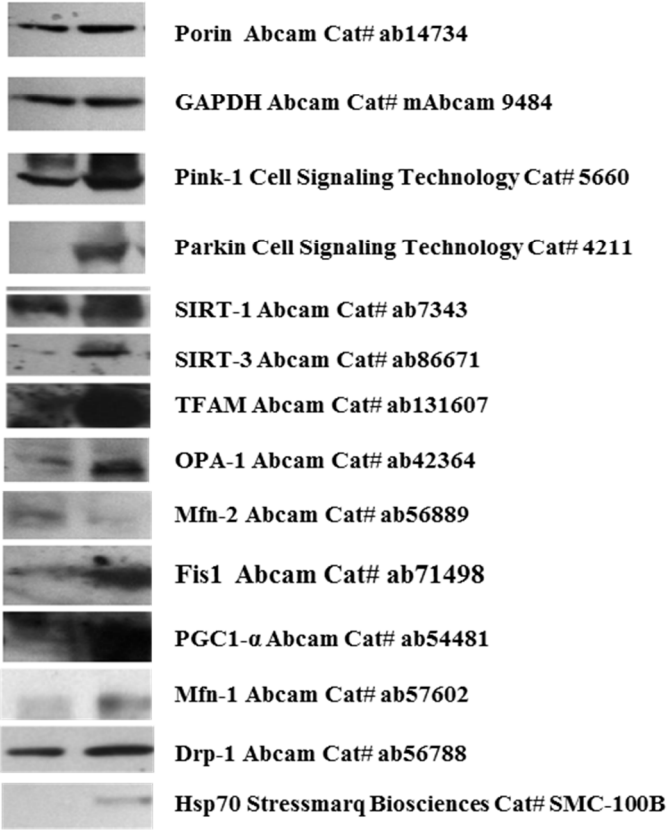

## Supporting Information Figure S2.

Representative histological images demonstrating A) fat cell size B) classically activated M1 macrophage staining by CD68 immunohistochemistry (Bar = 100  $\mu\text{m}$ ) and C) example of an alternatively activated M2 macrophage by CD163 immunohistochemistry.

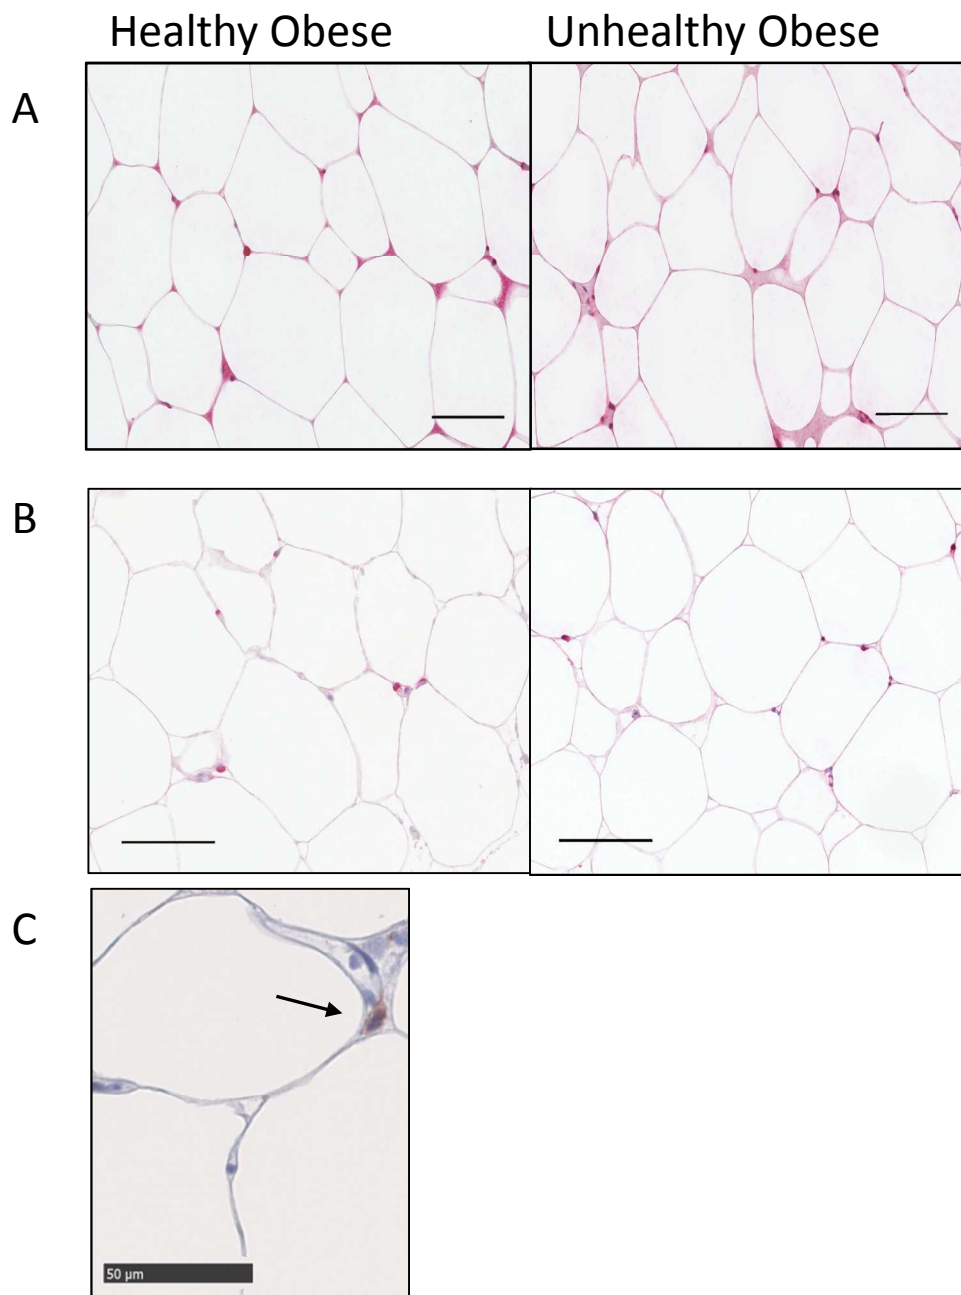

Supplement: NIHMS835638-supplement-01.pdf [file NIHMS835638-supplement-01.pdf]
